# Supplementary material
Source: PubMed Central journal article supplement (PMC3487563)
Supplement: supp_2012.064444_2012_064444-Contributions.pdf [file supp_2012.064444_2012_064444-Contributions.pdf]

**Manuscript no. HAEMATOL/2012/064444 entitled “Thrombosis is associated with inferior survival in multiple myeloma“**

**Authors: Sigurdur Y Kristinsson, Ruth M Pfeiffer, Magnus Björkholm, Sam Schulman, Ola Landgren**

**Information about the contributions of each person named as having participated in the study**

**1) Guarantor(s)**, i.e., person(s) who is (are) responsible for the integrity of the work as a whole:

- Sigurdur Yngvi Kristinsson M.D., Ph.D.; Department of Medicine, Division of Hematology, Karolinska University Hospital Solna, SE-171 76 Stockholm, Sweden.

Email: sigurdur.kristinsson@ki.se

- Sigurdur Y Kristinsson, Karolinska University Hospital, sigurduru.kristinsson

According to the International Committee of Medical Journal Editors (ICMJE)

([http://www.icmje.org/ethical\\_1author.html](http://www.icmje.org/ethical_1author.html)): “*Authorship credit should be based on: 1) substantial contributions to conception and design, acquisition of data, or analysis and interpretation of data; 2) drafting the article or revising it critically for important intellectual content; and 3) final approval of the version to be published. Authors should meet conditions 1, 2, and 3 ..... Acquisition of funding, collection of data, or general supervision of the research group alone does not constitute authorship*”.

The guarantors of this manuscript confirm that all persons designated as authors qualify for authorship, and that each author has participated sufficiently in the work to take public responsibility for appropriate portions of the content.

2) Authors who participated in the **conception of the study**: SY Kristinsson, RM Pfeiffer, and O Landgren

3) **Design & Methods**. The following authors were responsible for specific investigations:

- SY Kristinsson, M Björkholm, and O Landgren obtained data and initiated this work.
- RM Pfeiffer performed all statistical analyses.
- All the authors were involved in the interpretation of the results.

4) **Results**. The following authors were responsible for specific portions of the results, including figures and tables (please indicate the person responsible for each figure and each table):

- RM Pfeiffer performed all statistical analyses.

5) **Writing the manuscript**. The following authors were responsible for writing the manuscript:

- SY Kristinsson, RM Pfeiffer, and O Landgren wrote the report.
- All authors read, gave comments, and approved the final version of the manuscript.

6) **Contributors Listed in Acknowledgments**:

This research was supported by grants from the regional agreement on medical training and clinical research (ALF) between Stockholm County Council and Karolinska Institutet, the Cancer Society in Stockholm, and the Intramural Research Program of the NIH, NCI. The authors thank the Medical Product Agency in Sweden. The authors thank Lynn Goldin for important work in constructing the database, Ms. Shiva Ayobi, The National Board of Health and Welfare, Stockholm, Sweden; Medical Products Agency, Uppsala, Sweden; and Ms. Susanne Dahllöf, Statistics Sweden, Örebro, Sweden.
